# Supplementary material for: New insights into meningitic Escherichia coli infection of brain microvascular endothelial cells from quantitative proteomics analysis
Source: J Neuroinflammation. 2018 Oct 19;15:291. doi: 10.1186/s12974-018-1325-z (PMC6195690; doi:10.1186/s12974-018-1325-z)
Supplement: Supplementary file 7 — Table S7. Ingenuity Canonical Pathways of RS218-infected group. (XLSX 71 kb) [file 12974_2018_1325_MOESM7_ESM.xlsx]

## Sheet: Sheet1
Supplemental Table 7. Ingenuity Canonical Pathways of RS218-infected group
Ingenuity Canonical Pathways	-log(p-value)	Ratio	z-score	Molecules
Granzyme A Signaling	7.34	0.235	NaN	HIST1H1B,HIST1H1C,HIST1H1E,HIST1H1D
EIF2 Signaling	3.17	0.0217	NaN	RPL15,EIF2B4,RPS9,RPL18
Regulation of eIF4 and p70S6K Signaling	2.35	0.0196	NaN	EIF2B4,RPS9,PPP2R1B
Eumelanin Biosynthesis	2.06	0.25	NaN	MIF
Protein Kinase A Signaling	2.06	0.0107	2	HIST1H1B,HIST1H1C,HIST1H1E,HIST1H1D
nNOS Signaling in Skeletal Muscle Cells	1.52	0.0714	NaN	DMD
